# Supplementary material
Source: Research Square preprint supplement (doi:10.21203/rs.3.rs-9171161/v1)
Supplement: Supplementary file 1 [file 399388bd57ef4b73453b3f45.docx]

Table 3. Detection of metastatic lymph nodes according to TLNs and BD

| Metastasis Type | Total Metastatic LNs (n) | TLNs (+)  n (%) | TLNs and BD (+)  n (%) |
| --- | --- | --- | --- |
| MacroM | 42 | 42 (100%) | 27 (64.3%) |
| MicroM | 30 | 30 (100%) | 18 (60.0%) |
| ITCs | 41 | 41 (100%) | 14 (34.1%) |

Data are presented as n (%). Percentages for TLNs (+) and TLNs and BD (+) are calculated based on the total number of metastatic lymph nodes within each metastasis category. TLNs (+) indicates metastases detected in targeted lymph nodes, while TLNs and BD (+) indicates metastases detected in both targeted lymph nodes and blue dye-identified nodes.

**Abbreviations:** LN, lymph node; TLN, targeted lymph node; BD, blue dye; MacroM, macrometastasis; MicroM, micrometastasis; ITCs, isolated tumor cells.
