# Supplementary material
Source: Research Square preprint supplement (doi:10.21203/rs.3.rs-9171161/v1)
Supplement: Supplementary file 2 [file 48c0e9fbdd5bfa2823a7231a.docx]

## Table 4. Discordant detection of metastatic lymph nodes between TLNs and BD

| Metastasis Type | TLNs (+)/BD (-)  (n) | TLNs (-)/BD (+)  (n) | McNemar Exact p-value |
| --- | --- | --- | --- |
| MacroM | 15 | 0 | 0.000061 |
| MicroM | 12 | 0 | 0.000488 |
| ITCs | 27 | 0 | <0.00000001 |

Data are presented as counts (n). Discordant cases between targeted lymph nodes (TLNs) and blue dye (BD) are shown. McNemar’s exact test was used to compare paired proportions of discordant findings. A two-sided p-value < 0.05 was considered statistically significant.

**Abbreviations:** TLN, targeted lymph node; BD, blue dye; MacroM, macrometastasis; MicroM, micrometastasis; ITCs, isolated tumor cells.
