# Supplementary material
Source: Research Square preprint supplement (doi:10.21203/rs.3.rs-9171161/v1)
Supplement: Supplementary file 3 [file c81fd4243e4993d2e3f0202e.docx]

Table 2. Comparison of continuous variables according to SLNB status

| **Variable** | **SLNB (−) Metastasis Absent (n=41)** | **SLNB (+) Metastasis Present (n=42)** | **Total (n=83)** |
| --- | --- | --- | --- |
| Body Mass Index (kg/m²) | 25.70 ± 2.94 / 25.55 | 25.97 ± 1.90 / 26.29 | 25.70 ± 2.48 / 25.92 |
| Age at surgery (years) | 48.00 ± 10.08 / 49.29 | 50.00 ± 11.48 / 48.98 | 49.00 ± 10.75 / 49.13 |
| Tumor diameter (mm) | 27.00 ± 13.51 / 28.22 | 30.00 ± 14.28 / 33.29 | 29.00 ± 14.05 / 30.78 |
| Greatest LN diameter (mm) | 19.00 ± 4.82 / 18.68 | 18.00 ± 6.59 / 18.50 | 18.00 ± 5.75 / 18.59 |

Data are presented as mean ± standard deviation (SD) and median values. Continuous variables were compared using the Student’s t-test or Mann–Whitney U test, as appropriate based on distribution normality. A p-value < 0.05 was considered statistically significant

**Abbreviations:** SLNB, sentinel lymph node biopsy; LN, lymph node; BMI, body mass index; SD, standard deviation.
