# Supplementary material
Source: Research Square preprint supplement (doi:10.21203/rs.3.rs-9171161/v1)
Supplement: Supplementary file 4 [file cc72e5ea01dd732d98e27c71.docx]

Table1. Baseline clinicopathological and intraoperative characteristics of the study cohort (n = 83)

|  | N (%) |
| --- | --- |
| Smoking Status |  |
| Non-smoker | 48 (57.9) |
| Current Smoker | 35 (42,2) |
|  |  |
| Menopausal Status |  |
| Premenopausal | 33 (39,8) |
| Postmenopausal | 50 (60,2) |
| Number of Suspicious LNs on US |  |
| 1 | 12 (14,5) |
| 2 | 34 (41.0) |
| >3 | 37 (44,6) |
| BD Identification |  |
| Identified by SLNB | 62 (74,7) |
| Identified by ALND | 7 (8,4) |
| Not Identified | 14 (16,9) |
| Intraoperative Concordance Between TLNs And BD |  |
| Absent | 36 (43,4) |
| Present | 47 (56,6) |
| SLNB Result |  |
| No metastasis | 41 (49,4) |
| Metastasis present | 42 (50,6) |
| MacroM |  |
| Absent | 41 (49,4) |
| TLNs | 15 (35.7) |
| TLNs and BD | 27 (64.3) |
| MicroM |  |
| Absent | 53 (63,9) |
| TLNs | 12 (40.0) |
| TLNs and BD | 18 (60.0) |
| ITC |  |
| Absent | 42 (50,6) |
| TLNs | 27 (65.9) |
| TLNs and BD | 14 (34.1) |

Data are presented as n (%). Percentages may not sum to 100% due to rounding. The distribution of metastatic involvement (MacroM, MicroM, and ITC) is reported according to detection in targeted lymph nodes (TLNs) and/or blue dye (BD)-identified nodes.

**Abbreviations:** LN, lymph node; US, ultrasonography; BD, blue dye; SLNB, sentinel lymph node biopsy; ALND, axillary lymph node dissection; TLN, targeted lymph node; MacroM, macrometastasis; MicroM, micrometastasis; ITC, isolated tumor cells.
